# Supplementary material for: Spoilage of Chilled Fresh Meat Products during Storage: A Quantitative Analysis of Literature Data
Source: Microorganisms. 2020 Aug 6;8(8):1198. doi: 10.3390/microorganisms8081198 (PMC7465036; doi:10.3390/microorganisms8081198)
Supplement: Supplementary file 1 [file microorganisms-08-01198-s001.xls]

## Sheet: Table S1
		Type of meat												Animal diet supplementation	Physical Treatments								biopreservation	formulation	Packaging	Spoilage responses
publications	year	chicken / turkey	beef	pork	lamb	venison	goat	llama	foal	rabbit	fresh	processed	cooked / semi-cooked		irradiation	cold plasma	High pressure processing (HPP)	post-packaging heat treatment	hot water surface pasteurisation	electrolized water or aqueous ozone	active packaging (antimicrobials + film)	Dipping / spraying antimicrobials				pH	redox potential	water activity aw	Gas measurement	couleur	sensory analyses	Volatile Organic compounds (VOC)	Organic acids	Fourier transform infrared (FTIR) spectroscopy	Total volatile basic nitrogen (TVB-N	biogenic amines	TBARS (lipid oxidation)	antioxidant activity ( with beta-carotene / DPPH)	isolate identification	Pyrosequencing or illumina 16S sequencing	16S rRNA amplicon target sequencing	PCR quantification	maldi-tof	growth modeling	Bacterial enumeration
Blickstad_1984	1984			x							x														air / MAP			x	x	x															x
Enfors_1984	1984			x							x														air / nitrogen				x
Korkeala_1985	1985			x								x	x												vacuum	x					x														x
Lee_1985	1985			x							x														vaccuum / nitrogen	x					x														x
Morishita_1986	1986	x		x							x																												x						x
Narasimha Rao_1986	1986				x						x											x				x																			x
Korkeala_1987	1987			x								x	x												vacuum	x			x		x														x
Makela_1987	1987			x								x	x																																x
Borch_1988	1988		x	x								x						x							Vacuum														x						x
Korkeala_1988	1988			x								x	x												vacuum														x						x
Schulz_1988	1988			x							x														vacuum / MAP																				x
Korkeala_1989	1989			x								x	x												vacuum																				x
Nortjé_1989	1989		x								x														MAP				x	x	x						x		x						x
Gill_1990	1990	x									x														vaccuum / MAP					x	x								x						x
Kleinlein_1990	1990		x								x														MAP / air																				x
Rödel_1990	1990		x	x								x														x	x																		x
Zeitoun_1990	1990	x									x											x				x					x														x
Dykes_1991	1991											x	x												vacuum																				x
von Holy_1991	1991			x								x	x												vacuum	x													x						x
Zeitoun_1991	1991	x									x											x			MAP	x																			x
Gill_1992	1992			x							x																												x						x
Makela_1992	1992			x								x	x																										x						x
Marshall_1992	1992	x										x	x												MAP																				x
Zeitoun_1992	1992	x									x											x			MAP	x			x	x	x														x
Bradford_1993	1993			x								x												Lactate		x				x	x						x								x
Buys_1993	1993			x							x														vacuum / MAP					x	x														x
Farkas_1993	1993		x	x							x				x									0.5% (w/w) of glucono-delta-lactone or approx. 0.1% (w/w) ascorbic acid	vacuum	x		x																	x
Grandison_1993	1993	x									x				x										air / MAP					x	x														x
Gustavsson_1993	1993		x								x																																		x
McMullen_1993	1993			x							x																												x						x
Muermans_1993	1993			x								x													vacuum / air														x					x	x
Nerbrink_1993	1993			x								x													vacuum																			x	x
Shu_1993	1993			x							x														air
Blair_1994	1994		x								x																												x						x
Buys_1994	1994			x							x														MAP					x	x														x
McMullen_1994	1994			x							x														MAP	x			x	x	x														x
Venugopal_1994	1994		x								x														air / MAP														x			1			x
Drosinos_1995a	1995				x						x															x													x						x
Drosinos_1995b	1995				X																				MAP	x
Gill_1995	1995			x								x	x																																x
Greer_1995	1995			x							x											x			air	x																			x
Guerrero_1995	1995		x	x							x											x				x				x															x
Jeremiah_1995	1995			x							x														MAP	x				x	x														x
Leisner_1995	1995		x								x														air / vaccuum	x				x	x														x
Russell_1995	1995	x									x		x																										x						x
Borch_1996	1996		X	X																					air / MAP					x															x
Broda_1996	1996		x		x	x					x														vacuum																				x
Broda_1996b	1996		x		x	x					x																					x													x
Holley_1996	1996		x	x								x	x												vaccuum	x		x		x	x														x
Holley_1996b	1996		x									x	x												vaccuum	x																			x
Lambropoulou_1996	1996		x								x													polydextrose / glucose	air / MAP	x																			x
Nunez_1996	1996			x								x																											x						x
Gamage_1997	1997		x								x				x											x													x						x
Greer_1997	1997		x								x														vaccuum	x				x	x														x
Jeremiah_1997a	1997			x							x														MAP
Jeremiah_1997b	1997				x						x														vaccuum	X																			x
Kamat_1997	1997			x							x		x		x																x														x
Ridel_1997	1997		x								x																												x						x
Sadler_1997	1997		x								x													NaCl / polydextrose	vaccum / MAP	x																			x
Sadler_1997b	1997		x								x													sel / nitrites	air / MAP	x					x														x
Sheridan_1997	1997				x						x														vacuum / MAP						x														x
Sorheim_1997b	1997			x							x														MAP	1			x	x															x
Hugas_1998	1998
Lebert_1998	1998			x									x																															x
Luno_1998	1998		x								x														MAP					x	x														X
Palumbo_1988	1988			x							x													NaCl	Vacuum	x																			x
Penney_1998	1998		x																						vaccuum / MAP	x			x	x	x														x
Blixt_1999	1999		x								x														vacuum						x	x													x
Devlieghere1999	1999												x												MAP			x	X															x	x
Dogbevi1999	1999			x							x				x																														x
Sorheim_1999	1999		x	x							x														MAP/ vacuum	x			x	x	x														x
Buys_2000	2000		x								x														MAP																				x
Devlieghere2000	2000												x											lactate	MAP			x	x															x	x
Gevers_2000	2000	x		x							x	x	x												MAP														x						x
Lacroix_2000	2000			x							x				x										vaccuum / air / MAP					x	x														x
Senter_2000	2000	x									x														Vacuum							x													x
Bell_2001	2001		x								x							x							vaccuum
Lacroix_2002	2002			x							x				x										vacuum						x														x
Skandamis_2002	2002		x								x														air / vacuum / MAP					x	x	x	x											x	x
Deumier_2003	2003	x										x											x	lactate		x					x														x
Djenane_2003	2003		x								x											x			MAP	x			x	x							x								x
Gevers_2003	2003			x								x																											x						x
Gill_2003	2003												x										x	nisin, lysozyme, nitrite, EDTA, chrisin																					x
Nattress_2003	2003			x							x											x				x				x	x														x
Noonpakdee_2003	2003			x									x										x																x
Papamanoli_2003	2003			x								x											x	sodium nitrate (0.02%), sodium nitrite (0.01%), sodium ascorbate		x													x						x
Susiluoto_2003	2003	x									x													marinade (water, vegetable oil, sucrose or glucose, citric or acetic acid, sodium chloride (0.7–1.3%), potassium sorbate, sodium benzoate, xanthan gum and guar gum)	MAP														x						x
Cocolin_2004	2004			x								x														x													x						x
Holley_2004	2004			x							x															x													x						x
Linton_2004	2004	x									x						X								Vacuum														x						x
Livingston_2004	2004			x							x													NaCl / phosphate / lactate	MAP	x				x	x														x
Smolander_2004	2004	x									x														MAP					x	x
Vermeiren_ 2004	2004			x								x	x										x		vacuum	x					x								x					x	x
Berruga_2005	2005				x						x														vaccuum / MAP					x	x						x							x	x
Cayre2005	2005		x	x								x													vacuum	x																		x	x
Koort_2005	2005	x									x																												x			x			x
Martinez_2005	2005			x								x													MAP	x			x	x	x						x								x
Nortjé_2005	2005		x								x				x										Vacuum		x				x						x								x
Rodríguez-Calleja_2005	2005									x	x														air	x					x														x
Sachindra_2005	2005			x																					MAP / vacuum																				x
Tremonte_2005	2005			x								x													MAP / air	x				x															x
Viana_2005	2005			x							x														vacuum / MAP	x				x	x														x
Ahnstrom_2006	2006		x									x													vaccuum	x					x														x
Balamatsia_2006	2006	x									x														air / MAP	x					x					x									x
Koort_2006	2006	x									x																												x						x
Liu_2006	2006			x							x																																	x	x
Patsias_2006	2006	x											x												air / MAP	x					x						x								X
Russo_2006	2006		x								x																												x						x
Vermeiren_2006	2006			x								x	x										x		vacuum / MAP	x			x		x														x
Balamatsia_2007	2007	x									x														vaccuum / air / MAP					x	x														x
Brightwell_2007	2007				x						x														air / vacuum	x													x		x				x
DelRio_2007	2007	x									x											x				x				x	x														x
Georgantelis_2007	2007			x								x												chitosan / rosemary oil		x											x								x
Min_2007	2007		x	x							x				x									acetic acid, citric acid, lactic acid												x									x
Rubio_2007	2007			x							x														vacuum / air / MAP	x		x		x	x														x
Vestergaard_2007	2007			x								x	x												MAP					x	x	x													x
Vihavainen_2007	2007		x								x													marinade (vegetable oil, soy sauce, sucrose, salt, mustard, glucose, vinegar based seasoning sauces)	MAP	x				x	x								x						x
Friedrich_2008	2008		x								x													(LA2) 2% lactic acid, (LA5) 5% lactic acid, (LA2-NaA) 2% lactic acid + 0.5% sodium ascorbate, (20KL) 20% potassium lactate, and (20KS) 20% potassium sorbate.	MAP	x			x	x	x	x													X
Koutsoumanis_2008	2008			x							x																		x															x	x
Sørensen_2008	2008			x								x																																	x
Ammor_2009	2009		x								x										x				air / MAP	x				x	x			x										x	x
Economou2009	2009	x									x											x			MAP					x	x				x										x
Leroy_2009	2009			x								x	x												MAP	x						x													x
Marouani Gadri_2009	2009	x	x	x							x																												x			x			x
Slongo_2009	2009			x								x	x				x								vacuum																			x	x
Vaikousi_2009	2009		x								x														MAP	x					x													x	x
Vihavainen_2009	2009																																						x						x
Argyri_2010	2010		x								x																			x	x			x										x	x
Audenaert_2010	2010	x		x																					MAP														X						x
Diaz_2010	2010			x							x														vaccuum / MAP	x				x	x														x
Doulgeraki_2010	2010		x								x										x				MAP														X						x
Ellouze_2010	2010	x	x								x														MAP	x				x														x	x
Ercolini_2010a	2010	x	x	x							x																				x	x							x						x
Ercolini_2010b	2010		x								x																												x						x
Jiang_2010	2010			x							x														vaccuum														x			x			x
Limbo_2010	2010		x								x														MAP				x	x		x					x							x	x
Ntzimani_2010	2010	x											x								x				vaccuum / air						x														x
Patterson_2010	2010	x											x				x								vacuum	x													x		x				x
Ruiz-Capillas_2010	2010			x																					MAP / air / vacuum	x		x	x	x	x					x									x
Samapundo_2010	2010			x								x	x										x	NaCl	MAP	x		x																	x
Schirmer_2010	2010			x							x													marinade (citrate, acetate, glucose, NaCl)	Vacuum / MAP	x					x								x						x
Vasilopoulos_2010	2010			x								x	x												MAP														x						x
Vasilopoulos_2010b	2010			x								x	x										x		MAP	x					x								x					x	x
Argyri_2011	2011		x								x										x				air / MAP	x				x	x		x											x	x
Curiel_2011	2011			x								x													vacuum / MAP											x			x						x
Doulgeraki_2011	2011		x								x										x				MAP														x						x
Hasapidou_2011	2011	x									x													oregano essential oil / EDTA	air / MAP	x					x						x								x
Hauge_2011	2011				x						x								x											x	x														x
Nieminen_2011	2011		x	x							x														MAP	x													x			x			x
Papadopoulou_2011a	2011			x							x																			x	x			x										x	x
Papadopoulou_2011b	2011			x							x																			x	x	x
Pennacchia_2011	2011		x								x														vaccuum / air														x			x			x
Torrieri_2011	2011			x								x													MAP / air	x			x	x	x													x	x
Voidarou_2011	2011																																												x
Andritsos_2012	2012			x							x															x																			x
Banon_2012	2012				x						x														MAP	x				x	x						x								x
Coutinho DeOliveira_2012	2012		x	x								x												Satureja montana L. essential oil / nitrites						x							x	x
Holm_2012	2012			x								x													MAP						x	x													x
La Storia_2012	2012		x								x										x				MAP / air	x			x	x	x	x							x			x			x
Lorenzo_2012	2012								x		x														vacuum/ air / MAP	x				x	x						x								x
Lucquin_2012	2012		x									x													vaccuum / MAP														x						x
Nowak_2012	2012	x	x	x							x										x				MAP					x	x														x
Papadopoulou_2012	2012			x							x														air / MAP														x			x			x
Petrou_2012	2012	x																				x			MAP	x				x	x						x								x
Rahkila_2012	2012			x							x														MAP						x								x					x	x
Serrano_2012	2012			x								x												sulphites / oregano essential oil		x				x	x						x								x
Zhang_2012	2012	x									x														air	x									x				x						x
Argyri_2013	2013		x								x														air / MAP	x				x	x			x										x	x
Doulgeraki_2013	2013		x								x										x				MAP														x						x
Ferrentino_2013	2013			x									x				x								air	x				x															x
Herbert_2013	2013	x									x														MAP																				x
Holm_2013	2013			x								x													MAP						x	x													x
Jaaskelainen_2013	2013			x							x														MAP	x			x		x	x							x
Kiermeier_2013	2013				x						x														vacuum / MAP	x					x									x				x	x
Li_2013	2013			x							x																																	x	x
Limbo_2013	2013		x								x														MAP	x				x							x								X
Murphy_2013	2013		x								x														MAP	x			x	x	x						x								X
Oses_2013	2013				x						x														air / MAP				x										x			x			x
Säde_2013	2013	x	x	x							x													marinade	MAP	x													x						x
Triki_2013	2013		x								x														air	x				x	x					x	x								x
Vasilatos_2013	2013	x									x											x			vacuum						x														x
Lerasle_2014	2014	x									x						x							lactate	MAP			x																	x
Benson_2014	2014			x								x												Lactate / diacetate	air						x	x								x					x
Blana_2014	2014		x								x										x				air / MAP	x																			x
Crist_2014	2014			x								x												lactate / acetic derivatives		x				x	x						x								x
Higueras_2014	2014	x									x																																		x
Huang_2014	2014			x							x														air					x						x									x
Kapetanakou_2014	2014			x							x										x				MAP	x			x	x	x		x												x
Kalschne_2014	2014			x								x	x										X	NaCl; erythorbate, lactate, nisin, pediocin, triphosphates	vacuum	x																		x	x
Latou_2014	2014	x									x											x			air / MAP	x			x	x	x						x								x
Lavieri_2014	2014		x								x														vaccuum / MAP	x				x	x						x								x
Li_2014	2014			x							x														vaccuum / air / MAP											x									x
Meredith_2014	2014	x									x														MAP				x																x
Ortuno_2014	2014				x						x														MAP	x				x	x	x					x								x
Panea_2014	2014	x									x														MAP / vaccuum					x	x						x								X
Pavelkova_2014	2014	x									x											x			vaccuum / air																				x
Rogers_2014	2014		x								x														air / MAP / vacuum					x	x						x								x
Rubio_2014	2014			x								x					x						x		MAP	x		x											x						x
Rukchon_2014	2014	x									x															x				x					x										x
Serrano_2014	2014				x						x														MAP	x				x	x						x								x
Xavier_2014	2014		x								x				x											x				x	x						x					x			x
Yang_2014	2014		x								x														vacuum	x																x			x
Argyri_2015	2015		x								x														air / MAP	x				x	x	x													x
Chaillou_2015	2015	x	x	x							x														MAP																x				x
Magrinya_2015	2015			x							x													lactate /lauryl arginate / methyl paraben	vacuum																				x
Masana_2015	2015		x									x					x							lactate	vacuum	x		x																	x
Nieminen_2015	2015			x							x														MAP	x													x						x
Ortuno_2015	2015				x						x															x				x	x	x					x
Oses_2015	2015				x						x												x		vaccuum / MAP				x	x	x														X
Pereira_2015a	2015			x								x	x												vaccuum / MAP	x		x	x		x														x
Pereira_2015b	2015									x	x														MAP	x																		X	X
Rossaint_2015	2015	x									x														MAP				x	x	x													x	x
Stahl_2015	2015			x								x	x												MAP			x		x		x												x	x
Stoops_2015	2015		x								x													spices / lactate / acetate	MAP				x	x										x					x
Baldin_2016	2016		x									x												microencapsulated jabuticaba	air	x				x	x						x								x
Chulayo_2016	2016		x								x															x				x															X
Fasolato_2016	2016			x								x												phenol extract from olive vegetation water		x		x											x						x
Fontana_2016	2016							x				x											x			x		x								x			x	x					x
Fougy_2016	2016			x								x												NaCl	vaccuum / MAP				x	x	x									x		x			x
Guillou_2016	2016	x										x					x							lactate	MAP					x	x														x
Holl_2016	2016	x									x														MAP				x										x				x		x
Jaaskelainen_2016	2016		x								x														Vaccuum / MAP	x			x		x	x							x		x				x
Jiang_2016	2016		x								x														MAP						x
Kabisch_2016	2016		x								x														vaccuum	x				x	x														x
Lloret_2016	2016			x								x	x												MAP	x		x	X	x	x														x
Mann_2016	2016			x							x																													x		x
MiksKrajnik_2016	2016	x									x														air					x	x	x												x	x
Nieminen_2016	2016			x							x														MAP	x			x		x	x							x			X			x
Paparella_2016	2016			x							x											x			MAP	x				x	x						x							x	x
Stellato_2016	2016		x	x							x																													x					x
Tsakanikas_2016	2016		x								x																																		x
Wang_2016	2016	x									x					x									MAP					x															x
Alizadeh Sani_2017	2017				x						x																			x	x														x
Belles_2017	2017				x						x														vaccuum / MAP					x	x						x								x
Carrizosa_2017	2017						x				x														MAP	x		x											x		x				x
Da Silva Sabo_2017	2017	x									x												x			x
Del Blanco_2017	2017			x							x															x	x			x		x	x		x										x
Geeraerts_2017	2017			x									x											caramel colour (E150; 1 samples), carotenoid (E160; 1 samples), sodium acetate (E262; 2 samples), potassium lactate (E326; 4 samples),carrageenan (E407; 8 samples), pyrophosphate (E450; 7 samples),sodium triphosphate (E451; 13 samples), polyphosphate (E452; 4samples), potassium chloride (E508; 4 samples), and/or disodium ribonucleotides (E635; 3 samples)	MAP	x													x						x
Kaur_2017	2017				x						x														vacuum / air	x				x	x								x					x	x
Kuswandi_2017	2017		x								x															x				x	x				x				x						x
Leticia_2017	2017				x						x														MAP					x	x						x								x
Reid_2017	2017		x								x														vaccuum	x																		x	x
Riel_2017	2017		x	x								x												parsley extract	MAP	x		x	x	x	x														x
Rodrigues_2017	2017		x								x														vaccuum	x			x	x	x														x
Säde_2017	2017		x								x														MAP	x			x		x								x	x					x
Silva_2017	2017			x								x													vacuum																			x	x
Sirocchi_2017	2017		x								x										x				vacuum / MAP	x			x	x	x														x
Van Haute_2017	2017			x								x												Cinnamon / marinade (NaCl, lactate)	MAP / vacuum					x	x														x
Wang_2017	2017	x											x													x					x	x			x				x						x
Argyri_2018	2018	x									x						x								vaccum					x	x														x
Botta_2018	2018		x								x									x					vaccuum	x						x									x				x
Geeraerts_2018	2018	x											x											sodium nitrite (E250; 42 samples), sodium ascorbate (E301; 42 samples), carrageenan (E407; 37 samples), sodium lactate (E325; 27 samples), sodium citrate (E331; 20 samples), potassium lactate (E326; 19 samples), pyrophosphate (E450; 9 samples), potassium chloride (E508; 6 samples), sodium erythrobate (E316; 3 samples), sodium phosphate (E339; 2 samples), and sodium triphosphate	MAP	x																			X
Hilgarth_2018	2018	x									x																												x	x	x		x		x
Raimondi_2018	2018			x								x													MAP	x					x	x				x			x	x					x
Ramaroson_2018	2018			x								x	x				x						x		vaccuum											x								x	x
Rouger_2018	2018	x									x														MAP															x
Shange_2018	2018		x								x														air	x				x															x
Stojanovic-Radic_2018	2018	x									x											x				x				x	x						x								x

## Sheet: References
Ahnström, M.L.; Seyfert, M.; Hunt, M.C.; Johnson, D.E., Dry aging of beef in a bag highly permeable to water vapour. Meat Sci 2006, 73, 674-679.
Alizadeh Sani, M.; Ehsani, A.; Hashemi, M., Whey protein isolate/cellulose nanofibre/tio2 nanoparticle/rosemary essential oil nanocomposite film: Its effect on microbial and sensory quality of lamb meat and growth of common foodborne pathogenic bacteria during refrigeration. Int J Food Microbiol 2017, 251, 8-14.
Ammor, M.S.; Argyri, A.A.; Nychas, G.-J.E., Rapid monitoring of the spoilage of minced beef stored under conventionally and active packaging conditions using fourier transform infrared spectroscopy in tandem with chemometrics. Meat Sci 2009, 81, 507-514.
Andritsos, N.D.; Mataragas, M.; Mavrou, E.; Stamatiou, A.; Drosinos, E.H., The microbiological condition of minced pork prepared at retail stores in athens, greece. Meat Sci 2012, 91, 486-489.
Argyri, A.A.; Doulgeraki, A.I.; Blana, V.A.; Panagou, E.Z.; Nychas, G.-J.E., Potential of a simple hplc-based approach for the identification of the spoilage status of minced beef stored at various temperatures and packaging systems. Int J Food Microbiol 2011, 150, 25-33.
Argyri, A.A.; Jarvis, R.M.; Wedge, D.; Xu, Y.; Panagou, E.Z.; Goodacre, R.; Nychas, G.-J.E., A comparison of raman and ft-ir spectroscopy for the prediction of meat spoilage. Food Control 2013, 29, 461-470.
Argyri, A.A.; Mallouchos, A.; Panagou, E.Z.; Nychas, G.-J.E., The dynamics of the hs/spme–gc/ms as a tool to assess the spoilage of minced beef stored under different packaging and temperature conditions. Int J Food Microbiol 2015, 193, 51-58.
Argyri, A.A.; Panagou, E.Z.; Tarantilis, P.A.; Polysiou, M.; Nychas, G.J.E., Rapid qualitative and quantitative detection of beef fillets spoilage based on fourier transform infrared spectroscopy data and artificial neural networks. Sensors and Actuators B: Chemical 2010, 145, 146-154.
Argyri, A.A.; Papadopoulou, O.S.; Nisiotou, A.; Tassou, C.C.; Chorianopoulos, N., Effect of high pressure processing on the survival of salmonella enteritidis and shelf-life of chicken fillets. Food Microbiol 2018, 70, 55-64.
Audenaert, K.; D'Haene, K.; Messens, K.; Ruyssen, T.; Vandamme, P.; Huys, G., Diversity of lactic acid bacteria from modified atmosphere packaged sliced cooked meat products at sell-by date assessed by pcr-denaturing gradient gel electrophoresis. Food Microbiol 2010, 27, 12-18.
Balamatsia, C.C.; Paleologos, E.K.; Kontominas, M.G.; Savvaidis, I.N., Correlation between microbial flora, sensory changes and biogenic amines formation in fresh chicken meat stored aerobically or under modified atmosphere packaging at 4 degrees c: Possible role of biogenic amines as spoilage indicators. Antonie Leeuwenhoek 2006, 89, 9-17.
Balamatsia, C.C.; Patsias, A.; Kontominas, M.G.; Savvaidis, I.N., Possible role of volatile amines as quality-indicating metabolites in modified atmosphere-packaged chicken fillets: Correlation with microbiological and sensory attributes. Food Chem 2007, 104, 1622-1628.
Baldin, J.C.; Michelin, E.C.; Polizer, Y.J.; Rodrigues, I.; de Godoy, S.H.S.; Fregonesi, R.P.; Pires, M.A.; Carvalho, L.T.; Fávaro-Trindade, C.S.; de Lima, C.G., et al., Microencapsulated jabuticaba (myrciaria cauliflora) extract added to fresh sausage as natural dye with antioxidant and antimicrobial activity. Meat Sci 2016, 118, 15-21.
Bañón, S.; Méndez, L.; Almela, E., Effects of dietary rosemary extract on lamb spoilage under retail display conditions. Meat Sci 2012, 90, 579-583.
Bell, R.G.; Moorhead, S.M.; Broda, D.M., Influence of heat shrink treatments on the onset of clostridial “blown pack” spoilage of vacuum packed chilled meat. Food Res Int 2001, 34, 271-275.
Bellés, M.; Alonso, V.; Roncalés, P.; Beltrán, J.A., The combined effects of superchilling and packaging on the shelf life of lamb. Meat Sci 2017, 133, 126-132.
Benson, A.K.; David, J.R.D.; Gilbreth, S.E.; Smith, G.; Nietfeldt, J.; Legge, R.; Kim, J.; Sinha, R.; Duncan, C.E.; Ma, J., et al., Microbial successions are associated with changes in chemical profiles of a model refrigerated fresh pork sausage during an 80-day shelf life study. Appl Environ Microbiol 2014, 80, 5178-5194.
Berruga, M.I.; Vergara, H.; Gallego, L., Influence of packaging conditions on microbial and lipid oxidation in lamb meat. Small Ruminant Res 2005, 57, 257-264.
Blair, I.S.; McDowell, D.A., Microbiological examination of pre-storage and post-storage intervention beef. Meat Sci 1994, 38, 155-161.
Blana, V.A.; Nychas, G.-J.E., Presence of quorum sensing signal molecules in minced beef stored under various temperature and packaging conditions. Int J Food Microbiol 2014, 173, 1-8.
Blickstad, E., Influence of water activity on microbial development in minced, cured pork, in relation to gas headspace composition. Food Microbiol 1984, 1, 177-185.
Blixt, Y.; Borch, E., Using an electronic nose for determining the spoilage of vacuum-packaged beef. Int J Food Microbiol 1999, 46, 123-134.
Borch, E.; Kant-Muermans, M.L.; Blixt, Y., Bacterial spoilage of meat and cured meat products. Int J Food Microbiol 1996, 33, 103-120.
Borch, E.; Nerbrink, E.; Svensson, P., Identification of major contamination sources during processing of emulsion sausage. Int J Food Microbiol 1988, 7, 317-330.
Botta, C.; Ferrocino, I.; Cavallero, M.C.; Riva, S.; Giordano, M.; Cocolin, L., Potentially active spoilage bacteria community during the storage of vacuum packaged beefsteaks treated with aqueous ozone and electrolyzed water. Int J Food Microbiol 2018, 266, 337-345.
Bradford, D.D.; Huffman, D.L.; Egbert, W.R.; Jones, W.R., Low fat fresh pork sausage patty stability in refrigerated storage with potassium lactate. J Food Sci 1993, 58, 488-491.
Brightwell, G.; Clemens, R.; Urlich, S.; Boerema, J., Possible involvement of psychrotolerant enterobacteriaceae in blown pack spoilage of vacuum-packaged raw meats. 2007; Vol. 119, pp 334-339.
Broda, D.M.; Delacy, K.M.; Bell, R.G.; Braggins, T.J.; Cook, R.L., Psychrotrophic clostridium spp. Associated with ‘blown pack’ spoilage of chilled vacuum-packed red meats and dog rolls in gas-impermeable plastic casings. Int J Food Microbiol 1996, 29, 335-352.
Broda, D.M.; DeLacy, K.M.; Bell, R.G.; Penney, N., Association of psychrotrophic clostridium spp. With deep tissue spoilage of chilled vacuum-packed lamb. 1996; Vol. 29, pp 371-378.
Buys, E.M.; Krüger, J.; Nortjé, G.L., Centralised bulk pre-packaging of fresh pork retail cuts in various gas atmospheres. Meat Sci 1994, 36, 293-308.
Buys, E.M.; Nortjé, G.L.; Jooste, P.J.; Von Holy, A., Bacterial populations associated with bulk packaged beef supplemented with dietary vitamin e. 2000; Vol. 56, pp 239-244.
Buys, E.M.; Nortjé, G.L.; Steyn, P.L., The effect of wholesale vacuum and 100% co2 storage on the subsequent microbiological, colour and acceptability attributes of pvc-overwrapped pork loin chops. Food Res Int 1993, 26, 421-429.
Carrizosa, E.; Benito, M.J.; Ruiz-Moyano, S.; Hernández, A.; Villalobos, M.d.C.; Martín, A.; Córdoba, M.d.G., Bacterial communities of fresh goat meat packaged in modified atmosphere. Food Microbiol 2017, 65, 57-63.
Cayré, M.E.; Garro, O.; Vignolo, G.; Cayre, M.E.; Garro, O.; Vignolo, G.; Cayré, M.E.; Garro, O.; Vignolo, G.; Cayre, M.E., et al., Effect of storage temperature and gas permeability of packaging film on the growth of lactic acid bacteria and brochothrix thermosphacta in cooked meat emulsions. Food Microbiol 2005, 22, 505-512.
Chaillou, S.; Chaulot-Talmon, A.; Caekebeke, H.; Cardinal, M.; Christieans, S.; Denis, C.; Helene Desmonts, M.; Dousset, X.; Feurer, C.; Hamon, E., et al., Origin and ecological selection of core and food-specific bacterial communities associated with meat and seafood spoilage. The ISME Journal 2015, 10.1038/ismej.2014.202, 1105-1118.
Chulayo, A.Y.; Bradley, G.; Muchenje, V., Effects of transport distance, lairage time and stunning efficiency on cortisol, glucose, hspa1a and how they relate with meat quality in cattle. Meat Sci 2016, 117, 89-96.
Cocolin, L.; Rantsiou, K.; Iacumin, L.; Cantoni, C.; Comi, G.; Urso, R., Study of the ecology of fresh sausages and characterization of populations of lactic acid bacteria by molecular methods study of the ecology of fresh sausages and characterization of populations of lactic acid bacteria by molecular methods. American Society for Microbiology 2004, 70, 1883-1894.
Coutinho de Oliveira, T.L.; Malfitano de Carvalho, S.; de Araújo Soares, R.; Andrade, M.A.; Cardoso, M.d.G.; Ramos, E.M.; Piccoli, R.H., Antioxidant effects of satureja montana l. Essential oil on tbars and color of mortadella-type sausages formulated with different levels of sodium nitrite. Lebensm-Wiss Technol 2012, 45, 204-212.
Crist, C.A.; Williams, J.B.; Schilling, M.W.; Hood, A.F.; Smith, B.S.; Campano, S.G., Impact of sodium lactate and vinegar derivatives on the quality of fresh italian pork sausage links. Meat Sci 2014, 96, 1509-1516.
Curiel, J.A.; Ruiz-Capillas, C.; Rivas, B.d.l.; Carrascosa, A.V.; Jiménez-Colmenero, F.; Muñoz, R., Production of biogenic amines by lactic acid bacteria and enterobacteria isolated from fresh pork sausages packaged in different atmospheres and kept under refrigeration. Meat Sci 2011, 88, 368-373.
da Silva Sabo, S.; Pérez-Rodríguez, N.; Domínguez, J.M.; de Souza Oliveira, R.P., Inhibitory substances production by lactobacillus plantarum st16pa cultured in hydrolyzed cheese whey supplemented with soybean flour and their antimicrobial efficiency as biopreservatives on fresh chicken meat. Food Res Int 2017, 99, 762-769.
Del Blanco, A.; Caro, I.; Quinto, E.J.; Mateo, J., Quality changes in refrigerated stored minced pork wrapped with plastic cling film and the effect of glucose supplementation. Meat Sci 2017, 126, 55-62.
del Río, E.; Panizo-Morán, M.; Prieto, M.; Alonso-Calleja, C.; Capita, R., Effect of various chemical decontamination treatments on natural microflora and sensory characteristics of poultry. Int J Food Microbiol 2007, 115, 268-280.
Deumier, F.; Collignan, A., The effects of sodium lactate and starter cultures on ph, lactic acid bacteria, listeria monocytogenes and salmonella spp. Levels in pure chicken dry fermented sausage. Meat Sci 2003, 65, 1165-1174.
Devlieghere, F.; Geeraerd, A.H.; Versyck, K.J.; Bernaert, H.; Van Impe, J.F.; Debevere, J., Shelf life of modified atmosphere packed cooked meat products: Addition of na-lactate as a fourth shelf life determinative factor in a model and product validation. Int J Food Microbiol 2000, 58, 93-106.
Devlieghere, F.; Van Belle, B.; Debevere, J., Shelf life of modified atmosphere packed cooked meat products: A predictive model. Int J Food Microbiol 1999, 46, 57-70.
Díaz, P.; Garrido, M.D.; Bañón, S., The effects of packaging method (vacuum pouch vs. Plastic tray) on spoilage in a cook-chill pork-based dish kept under refrigeration. Meat Sci 2010, 84, 538-544.
Djenane, D.; Sánchez-Escalante, A.; Beltrán, J.A.; Roncalés, P., The shelf-life of beef steaks treated with dl-lactic acid and antioxidants and stored under modified atmospheres. Food Microbiol 2003, 20, 1-7.
Dogbevi, M.K.; Vachon, C.; Lacroix, M., Physicochemical and microbiological changes in irradiated fresh pork loins. Meat Sci 1999, 51, 349-354.
Doulgeraki, A.I.; Nychas, G.-J.E., Monitoring the succession of the biota grown on a selective medium for pseudomonads during storage of minced beef with molecular-based methods. Food Microbiol 2013, 34, 62-69.
Doulgeraki, A.I.; Paramithiotis, S.; Kagkli, D.M.; Nychas, G.-J.E., Lactic acid bacteria population dynamics during minced beef storage under aerobic or modified atmosphere packaging conditions. Food Microbiol 2010, 27, 1028-1034.
Doulgeraki, A.I.; Paramithiotis, S.; Nychas, G.-J.E., Characterization of the enterobacteriaceae community that developed during storage of minced beef under aerobic or modified atmosphere packaging conditions. Int J Food Microbiol 2011, 145, 77-83.
Drosinos, E.H.; Board, R.G., Attributes of microbial associations of meat growing as xenic batch cultures in a meat juice at 4 °c. Int J Food Microbiol 1995, 26, 279-293.
Drosinos, E.H.; Board, R.G., Microbial and physicochemical attributes of minced lamb: Sources of contamination with pseudomonads. Food Microbiol 1995, 12, 189-197.
Dykes, G.A.; Eugene Cloete, T.; von Holy, A., Quantification of microbial populations associated with the manufacture of vacuum-packaged, smoked vienna sausages. Int J Food Microbiol 1991, 13, 239-248.
Economou, T.; Pournis, N.; Ntzimani, A.; Savvaidis, I.N., Nisin–edta treatments and modified atmosphere packaging to increase fresh chicken meat shelf-life. Food Chem 2009, 114, 1470-1476.
Ellouze, M.; Augustin, J.C., Applicability of biological time temperature integrators as quality and safety indicators for meat products. Int J Food Microbiol 2010, 138, 119-129.
Enfors, S.-O.; Molin, G., Carbon dioxide evolution of refrigerated meat. Meat Sci 1984, 10, 197-206.
Ercolini, D.; Casaburi, A.; Nasi, A.; Ferrocino, I.; Di Monaco, R.; Ferranti, P.; Mauriello, G.; Villani, F., Different molecular types of pseudomonas fragi have the same overall behaviour as meat spoilers. Int J Food Microbiol 2010, 142, 120-131.
Ercolini, D.; Ferrocino, I.; La Storia, A.; Mauriello, G.; Gigli, S.; Masi, P.; Villani, F., Development of spoilage microbiota in beef stored in nisin activated packaging. Food Microbiol 2010, 27, 137-143.
Farkas, J.; Andrássy, É., Interaction of ionising radiation and acidulants on the growth of the microflora of a vacuum-packaged chilled meat product. 1993; Vol. 19, pp 145-152.
Fasolato, L.; Carraro, L.; Facco, P.; Cardazzo, B.; Balzan, S.; Taticchi, A.; Andreani, N.A.; Montemurro, F.; Martino, M.E.; Di Lecce, G., et al., Agricultural by-products with bioactive effects: A multivariate approach to evaluate microbial and physicochemical changes in a fresh pork sausage enriched with phenolic compounds from olive vegetation water. Int J Food Microbiol 2016, 228, 34-43.
Ferrentino, G.; Balzan, S.; Spilimbergo, S., Optimization of supercritical carbon dioxide treatment for the inactivation of the natural microbial flora in cubed cooked ham. Int J Food Microbiol 2013, 161, 189-196.
Fontana, C.; Bassi, D.; López, C.; Pisacane, V.; Otero, M.C.; Puglisi, E.; Rebecchi, A.; Cocconcelli, P.S.; Vignolo, G., Microbial ecology involved in the ripening of naturally fermented llama meat sausages. A focus on lactobacilli diversity. Int J Food Microbiol 2016, 236, 17-25.
Fougy, L.; Desmonts, M.-H.; Coeuret, G.; Fassel, C.; Hamon, E.; Hézard, B.; Champomier-Vergès, M.-C.; Chaillou, S., Reducing salt in raw pork sausages increases spoilage and correlates with reduced bacterial diversity. Appl Environ Microbiol 2016, 82, 3928-3939.
Friedrich, L.; Siró, I.; Dalmadi, I.; Horváth, K.; Ágoston, R.; Balla, C., Influence of various preservatives on the quality of minced beef under modified atmosphere at chilled storage. Meat Sci 2008, 79, 332-343.
Gamage, S.D.; Faith, N.G.; Luchansky, J.B.; Buege, D.R.; Ingham, S.C., Inhibition of microbial growth in chub-packed ground beef by refrigeration (2°c) and medium-dose (2.2 to 2.4 kgy) irradiation. Int J Food Microbiol 1997, 37, 175-182.
Geeraerts, W.; Pothakos, V.; De Vuyst, L.; Leroy, F., Diversity of the dominant bacterial species on sliced cooked pork products at expiration date in the belgian retail. Food Microbiol 2017, 65, 236-243.
Geeraerts, W.; Pothakos, V.; De Vuyst, L.; Leroy, F., Variability within the dominant microbiota of sliced cooked poultry products at expiration date in the belgian retail. Food Microbiol 2018, 73, 209-215.
Georgantelis, D.; Ambrosiadis, I.; Katikou, P.; Blekas, G.; Georgakis, S.A., Effect of rosemary extract, chitosan and alpha-tocopherol on microbiological parameters and lipid oxidation of fresh pork sausages stored at 4°c. Meat Sci 2007, 76, 172-181.
Gevers, D.; Huys, G.; Devlieghere, F.; Uyttendaele, M.; Debevere, J.; Swings, J., Isolation and identification of tetracycline resistant lactic acid bacteria from pre-packed sliced meat products. Syst Appl Microbiol 2000, 23, 279-284.
Gevers, D.; Masco, L.; Baert, L.; Huys, G.; Debevere, J.; Swings, J., Prevalence and diversity of tetracycline resistant lactic acid bacteria and their tet genes along the process line of fermented dry sausages. Syst Appl Microbiol 2003, 26, 277-283.
Gill, A.O.; Holley, R.A., Interactive inhibition of meat spoilage and pathogenic bacteria by lysozyme, nisin and edta in the presence of nitrite and sodium chloride at 24 [deg]c. Int J Food Microbiol 2003, 80, 251-259.
Gill, C.O., Controlled atmosphere packaging of chilled meat. Food Control 1990, 1, 74-78.
Gill, C.O.; Bryant, J., The contamination of pork with spoilage bacteria during commercial dressing, chilling and cutting of pig carcasses. Int J Food Microbiol 1992, 16, 51-62.
Gill, C.O.; Friske, M.; Tong, A.K.W.; McGinnis, J.C., Assessment of the hygienic characteristics of a process for the distribution of processed meats, and of storage conditions at retail outlets. Food Res Int 1995, 28, 131-138.
Grandison, A.S.; Jennings, A., Extension of the shelf life of fresh minced chicken meat by electron beam irradiation combined with modified atmosphere packaging. Food Control 1993, 4, 83-88.
Greer, G.G.; Dilts, B.D., Lactic acid inhibition of the growth of spoilage bacteria and cold tolerant pathogens on pork. Int J Food Microbiol 1995, 25, 141-151.
Greer, G.G.; Jones, S.D.M., Quality and bacteriological consequences of beef carcass spray-chilling: Effects of spray duration and boxed beef storage temperature. Meat Sci 1997, 45, 61-73.
Guerrero, I.; Mendiolea, R.; Ponce, E.; Prado, A., Inoculation of lactic acid bacteria on meat surfaces as a means of decontamination in semitropical conditions. Meat Sci 1995, 40, 397-411.
Guillou, S.; Lerasle, M.; Simonin, H.; Anthoine, V.; Chéret, R.; Federighi, M.; Membré, J.M., Multi-criteria framework as an innovative tradeoff approach to determine the shelf-life of high pressure-treated poultry. Int J Food Microbiol 2016, 233, 60-72.
Gustavsson, P.; Borch, E., Contamination of beef carcasses by psychrotrophic pseudomonas and enterobacteriaceae at different stages along the processing line. Int J Food Microbiol 1993, 20, 67-83.
Hasapidou, A.; Savvaidis, I.N., The effects of modified atmosphere packaging, edta and oregano oil on the quality of chicken liver meat. Food Res Int 2011, 44, 2751-2756.
Hauge, S.J.; Wahlgren, M.; Røtterud, O.-J.; Nesbakken, T., Hot water surface pasteurisation of lamb carcasses: Microbial effects and cost-benefit considerations. Int J Food Microbiol 2011, 146, 69-75.
Herbert, U.; Rossaint, S.; Khanna, M.A.M.A.; Kreyenschmidt, J., Comparison of argon-based and nitrogen-based modified atmosphere packaging on bacterial growth and product quality of chicken breast fillets. Poult Sci 2013, 92, 1348-1356.
Higueras, L.; López-Carballo, G.; Hernández-Muñoz, P.; Catalá, R.; Gavara, R., Antimicrobial packaging of chicken fillets based on the release of carvacrol from chitosan/cyclodextrin films. Int J Food Microbiol 2014, 188, 53-59.
Hilgarth, M.; Fuertes, S.; Ehrmann, M.; Vogel, R.F., Photobacterium carnosum sp. Nov., isolated from spoiled modified atmosphere packaged poultry meat. Syst Appl Microbiol 2018, 41, 44-50.
Höll, L.; Behr, J.; Vogel, R.F., Identification and growth dynamics of meat spoilage microorganisms in modified atmosphere packaged poultry meat by maldi-tof ms. Food Microbiol 2016, 60, 84-91.
Holley, R.A.; McKellar, R.C., Influence of unsliced delicatessen meat freshness upon bacterial growth in subsequently prepared vacuum packed slices. Int J Food Microbiol 1996, 29, 297-309.
Holley, R.A.; Peirson, M.D.; Lam, J.; Tan, K.B., Microbial profiles of commercial, vacuum-packaged, fresh pork of normal or short storage life. Int J Food Microbiol 2004, 97, 53-62.
Holley, R.A.A.; Doyon, G.; Fortin, J.; Rodrigue, N.; Carbonneau, M., Post-process, packaging-induced fermentation of delicatessen meats. Food Res Int 1996, 29, 35-48.
Holm, E.S.; Schäfer, A.; Koch, A.G.; Petersen, M.A., Investigation of spoilage in saveloy samples inoculated with four potential spoilage bacteria. Meat Sci 2013, 93, 687-695.
Holm, E.S.; Schäfer, A.; Skov, T.; Koch, A.G.; Petersen, M.A., Identification of chemical markers for the sensory shelf-life of saveloy. Meat Sci 2012, 90, 314-322.
Huang, X.W.; Zou, X.B.; Shi, J.Y.; Guo, Y.; Zhao, J.W.; Zhang, J.; Hao, L., Determination of pork spoilage by colorimetric gas sensor array based on natural pigments. Food Chem 2014, 145, 549-554.
Hugas, M., Bacteriocinogenic lactic acid bacteria for the biopreservation of meat and meat products. Meat Sci 1998, 49, S139-S150.
Jääskeläinen, E.; Hultman, J.; Parshintsev, J.; Riekkola, M.-L.; Björkroth, J.; Jaaskelainen, E.; Hultman, J.; Parshintsev, J.; Riekkola, M.-L.; Bjorkroth, J., et al., Development of spoilage bacterial community and volatile compounds in chilled beef under vacuum or high oxygen atmospheres. Int J Food Microbiol 2016, 223, 25-32.
Jääskeläinen, E.; Johansson, P.; Kostiainen, O.; Nieminen, T.T.; Schmidt, G.; Somervuo, P.; Mohsina, M.; Vanninen, P.; Auvinen, P.; Björkroth, J., Significance of heme-based respiration in meat spoilage caused by leuconostoc gasicomitatum. Appl Environ Microbiol 2013, 79, 1078-1085.
Jeremiah, L.E.; Gibson, L.L., The influence of storage and display conditions on the color stability of display-ready pork loin roasts. Meat Sci 1997, 47, 1-16.
Jeremiah, L.E.; Gibson, L.L.; Argonosa, G., The influence of inherent muscle quality upon the storage life of chilled pork stored in co2 at −1.5 °c. Food Res Int 1995, 28, 51-59.
Jeremiah, L.E.; Greer, G.G.; Dilts, B.D., Influence of hot-processing and electrical stimulation on the bacteriology and retail case-life of vacuum packaged lamb. Food Res Int 1997, 30, 281-286.
Jiang, T.; Bratcher, C.L., Differentiation of commercial ground beef products and correlation between metabolites and sensory attributes: A metabolomic approach. Food Res Int 2016, 90, 298-306.
Jiang, Y.; Gao, F.; Xu, X.L.; Su, Y.; Ye, K.P.; Zhou, G.H., Changes in the bacterial communities of vacuum-packaged pork during chilled storage analyzed by pcr–dgge. Meat Sci 2010, 86, 889-895.
Kabisch, J.; Erl-Höning, C.; Wenning, M.; Böhnlein, C.; Gareis, M.; Pichner, R., Spoilage of vacuum-packed beef by the yeast kazachstania psychrophila. Food Microbiol 2016, 53, 15-23.
Kalschne, D.L.; Geitenes, S.; Veit, M.R.; Sarmento, C.M.P.; Colla, E., Growth inhibition of lactic acid bacteria in ham by nisin: A model approach. Meat Sci 2014, 98, 744-752.
Kamat, A.S.; Khare, S.; Doctor, T.; Nair, P.M., Control of yersinia enterocolitica in raw pork and pork products by γ-irradiation. Int J Food Microbiol 1997, 36, 69-76.
Kapetanakou, A.E.; Agathaggelou, E.I.; Skandamis, P.N., Storage of pork meat under modified atmospheres containing vapors from commercial alcoholic beverages. Int J Food Microbiol 2014, 178, 65-75.
Kaur, M.; Shang, H.; Tamplin, M.; Ross, T.; Bowman, J.P., Culture-dependent and culture-independent assessment of spoilage community growth on vp lamb meat from packaging to past end of shelf-life. Food Microbiol 2017, 68, 71-80.
Kiermeier, A.; Tamplin, M.; May, D.; Holds, G.; Williams, M.; Dann, A., Microbial growth, communities and sensory characteristics of vacuum and modified atmosphere packaged lamb shoulders. Food Microbiol 2013, 36, 305-315.
Kleinlein, N.; Untermann, F., Growth of pathogenic yersinia enterocolitica strains in minced meat with and without protective gas with consideration of the competitive background flora. Int J Food Microbiol 1990, 10, 65-71.
Koort, J.; Coenye, T.; Vandamme, P.; Björkroth, J., Streptococcus parauberis associated with modified atmosphere packaged broiler meat products and air samples from a poultry meat processing plant. Int J Food Microbiol 2006, 106, 318-323.
Koort, J.; Murros, A.; Coenye, T.; Eerola, S.; Vandamme, P.; Sukura, A.; Björkroth, J., Lactobacillus oligofermentans sp. Nov., associated with spoilage of modified-atmosphere-packaged poultry products. Appl Environ Microbiol 2005, 71, 4400-4406.
Korkeala, H.; Lindroth, S.; Ahvenainen, R.; Alanko, T., Interrelationship between microbial numbers and other parameters in the spoilage of vacuum-packed cooked ring sausages. Int J Food Microbiol 1987, 5, 311-321.
Korkeala, H.; Lindroth, S.; Suihko, M.; Kuhmonen, A.; Penttilä, P.L., Microbiological and sensory quality changes in blood pancakes and cooked ring sausage during storage. Int J Food Microbiol 1985, 2, 279-292.
Korkeala, H.; Mäkelä, P., Characterization of lactic acid bacteria isolated from vacuum-packed cooked ring sausages. Int J Food Microbiol 1989, 9, 33-43.
Korkeala, H.; Suortti, T.; Mäkelä, P., Ropy slime formation in vacuum-packed cooked meat products caused by homofermentative lactobacilli and a leuconostoc species. Int J Food Microbiol 1988, 7, 339-347.
Koutsoumanis, K.P.; Stamatiou, A.P.; Drosinos, E.H.; Nychas, G.J.E., Control of spoilage microorganisms in minced pork by a self-developed modified atmosphere induced by the respiratory activity of meat microflora. Food Microbiol 2008, 25, 915-921.
Kuswandi, B.; Nurfawaidi, A., On-package dual sensors label based on ph indicators for real-time monitoring of beef freshness. Food Control 2017, 82, 91-100.
La Storia, A.; Ferrocino, I.; Torrieri, E.; Di Monaco, R.; Mauriello, G.; Villani, F.; Ercolini, D., A combination of modified atmosphere and antimicrobial packaging to extend the shelf-life of beefsteaks stored at chill temperature. Int J Food Microbiol 2012, 158, 186-194.
Lacroix, M.; Smoragiewicz, W.; Jobin, M.; Latreille, B.; Krzystyniak, K., Protein quality and microbiological changes in aerobically- or vacuum-packaged, irradiated fresh pork loins. Meat Sci 2000, 56, 31-39.
Lacroix, M.L.; Smoragiewicz, W.; Jobin, M.; Latreille, B.; Krzystyniak, K., The effect of irradiation of fresh pork loins on the protein quality and microbiological changes in aerobically—or vacuum-packaged. Radiat Phys Chem 2002, 63, 317-322.
Lambropoulou, K.A.; Drosinos, E.H.; Nychas, G.J.E., The effect of glucose supplementation on the spoilage microflora and chemical composition of minced beef stored aerobically or under a modified atmosphere at 4 °c. Int J Food Microbiol 1996, 30, 281-291.
Latou, E.; Mexis, S.F.; Badeka, A.V.; Kontakos, S.; Kontominas, M.G., Combined effect of chitosan and modified atmosphere packaging for shelf life extension of chicken breast fillets. Lebensm-Wiss Technol 2014, 55, 263-268.
Lavieri, N.; Williams, S.K.K., Effects of packaging systems and fat concentrations on microbiology, sensory and physical properties of ground beef stored at 4±1°c for 25days. Meat Sci 2014, 97, 534-541.
Lebert, I.; Begot, C.; Lebert, A., Growth of pseudomonas fluorescens and pseudomonas fragi in a meat medium as affected by ph (5.8-7.0), water activity (0.97-1.00) and temperature (7-25°c). Int J Food Microbiol 1998, 39, 53-60.
Lee, B.H.; Simard, R.E.; Laleye, L.C.; Holley, R.A., Effects of temperature and storage duration on the microflora, physicochemical and sensory changes of vacuum- or nitrogen-packed pork. Meat Sci 1985, 13, 99-112.
Leisner, J.J.; Greer, G.G.; Dilts, B.D.; Stiles, M.E., Effect of growth of selected lactic acid bacteria on storage life of beef stored under vacuum and in air. Int J Food Microbiol 1995, 26, 231-243.
Lerasle, M.; Guillou, S.; Simonin, H.; Anthoine, V.; Chéret, R.; Federighi, M.; Membré, J.M., Assessment of salmonella and listeria monocytogenes level in ready-to-cook poultry meat: Effect of various high pressure treatments and potassium lactate concentrations. Int J Food Microbiol 2014, 186, 74-83.
Leroy, F.; Vasilopoulos, C.; Van Hemelryck, S.; Falony, G.; De Vuyst, L., Volatile analysis of spoiled, artisan-type, modified-atmosphere-packaged cooked ham stored under different temperatures. Food Microbiol 2009, 26, 94-102.
Leticia, M.; Paola, D.; Jordi, O.; Julio, O.; Sancho, B., Effects of sage distillation by-product (salvia lavandulifolia vahl.) dietary supplementation in light lambs fed on concentrates on meat shelf life and fatty acid composition. Meat Sci 2017, 134, 44-53.
Li, M.; Niu, H.; Zhao, G.; Tian, L.; Huang, X.; Zhang, J.; Tian, W.; Zhang, Q., Analysis of mathematical models of pseudomonas spp. Growth in pallet-package pork stored at different temperatures. Meat Sci 2013, 93, 855-864.
Li, M.; Tian, L.; Zhao, G.; Zhang, Q.; Gao, X.; Huang, X.; Sun, L., Formation of biogenic amines and growth of spoilage-related microorganisms in pork stored under different packaging conditions applying pca. Meat Sci 2014, 96, 843-848.
Limbo, S.; Torri, L.; Sinelli, N.; Franzetti, L.; Casiraghi, E., Evaluation and predictive modeling of shelf life of minced beef stored in high-oxygen modified atmosphere packaging at different temperatures. Meat Sci 2010, 84, 129-136.
Limbo, S.; Uboldi, E.; Adobati, A.; Iametti, S.; Bonomi, F.; Mascheroni, E.; Santagostino, S.; Powers, T.H.; Franzetti, L.; Piergiovanni, L., Shelf life of case-ready beef steaks (semitendinosus muscle) stored in oxygen-depleted master bag system with oxygen scavengers and co2/n2 modified atmosphere packaging. Meat Sci 2013, 93, 477-484.
Linton, M.; McClements, J.M.J.; Patterson, M.F., Changes in the microbiological quality of vacuum-packaged, minced chicken treated with high hydrostatic pressure. Innovative Food Science and Emerging Technologies 2004, 5, 151-159.
Liu, F.; Guo, Y.-z.; Li, Y.-f., Interactions of microorganisms during natural spoilage of pork at 5 °c. J Food Eng 2006, 72, 24-29.
Livingston, M.; Susan Brewer, M.; Killifer, J.; Bidner, B.; McKeith, F., Shelf life characteristics of enhanced modified atmosphere packaged pork. Meat Sci 2004, 68, 115-122.
Lloret, E.; Picouet, P.A.; Trbojevich, R.; Fernández, A., Colour stability of cooked ham packed under modified atmospheres in polyamide nanocomposite blends. LWT - Food Science and Technology 2016, 66, 582-589.
Lorenzo, J.M.; Gómez, M., Shelf life of fresh foal meat under map, overwrap and vacuum packaging conditions. Meat Sci 2012, 92, 610-618.
Lucquin, I.; Zagorec, M.; Champomier-Verges, M.; Chaillou, S., Fingerprint of lactic acid bacteria population in beef carpaccio is influenced by storage process and seasonal changes. Food Microbiol 2012, 29, 187-196.
Luño, M.; Beltrán, J.A.; Roncalés, P., Shelf-life extension and colour stabilisation of beef packaged in a low o2 atmosphere containing co: Loin steaks and ground meat. Meat Sci 1998, 48, 75-84.
Magrinya, N.; Terjung, N.; Loeffler, M.; Gibis, M.; Bou, R.; Weiss, J., Influence of fat addition on the antimicrobial activity of sodium lactate, lauric arginate and methylparaben in minced meat. Int J Food Microbiol 2015, 215, 86-94.
Mäkelä, P.; Korkeala, H., Lactobacillus contamination of cooked ring sausages at sausage processing plants. Int J Food Microbiol 1987, 5, 323-330.
Mäkelä, P.; Schillinger, U.; Korkeala, H.; Holzapfel, W.H., Classification of ropy slime-producing lactic acid bacteria based on DNA-DNA homology, and identification of lactobacillus sake and leuconostoc amelibiosum as dominant spoilage organisms in meat products. 1992; Vol. 16, pp 167-172.
Mann, E.; Wetzels, S.U.; Pinior, B.; Metzler-Zebeli, B.U.; Wagner, M.; Schmitz-Esser, S., Psychrophile spoilers dominate the bacterial microbiome in musculature samples of slaughter pigs. Meat Sci 2016, 117, 36-40.
Marouani-Gadri, N.; Augier, G.; Carpentier, B., Characterization of bacterial strains isolated from a beef-processing plant following cleaning and disinfection — influence of isolated strains on biofilm formation by sakaï and edl 933 e. Coli o157:H7. Int J Food Microbiol 2009, 133, 62-67.
Marshall, D.L.; Andrews, L.S.; Wells, J.H.; Farr, A.J., Influence of modified atmosphere packaging on the competitive growth of listeria monocytogenes and pseudomonas fluorescens on precooked chicken. Food Microbiol 1992, 9, 303-309.
Martinez, L.; Djenane, D.; Cilla, I.; Beltran, J.A.; Roncales, P., Effect of different concentrations of carbon dioxide and low concentration of carbon monoxide on the shelf-life of fresh pork sausages packaged in modified atmosphere. Meat Sci 2005, 71, 563-570.
Masana, M.O.; Barrio, Y.X.; Palladino, P.M.; Sancho, A.M.; Vaudagna, S.R., High pressure treatments combined with sodium lactate to inactivate escherichia coli o157:H7 and spoilage microbiota in cured beef carpaccio. Food Microbiol 2015, 46, 610-617.
McMullen, L.M.; Stiles, M.E., Microbial ecology of fresh pork stored under modified atmosphere at −1, 4.4 and 10°c. Int J Food Microbiol 1993, 18, 1-14.
McMullen, L.M.; Stiles, M.E., Quality of fresh retail pork cuts stored in modified atmosphere under temperature conditions simulating export to distant markets. Meat Sci 1994, 38, 163-177.
Meredith, H.; Valdramidis, V.; Rotabakk, B.T.; Sivertsvik, M.; McDowell, D.; Bolton, D.J., Effect of different modified atmospheric packaging (map) gaseous combinations on campylobacter and the shelf-life of chilled poultry fillets. Food Microbiol 2014, 44, 196-203.
Miks-Krajnik, M.; Yoon, Y.J.; Ukuku, D.O.; Yuk, H.G., Identification and quantification of volatile chemical spoilage indexes associated with bacterial growth dynamics in aerobically stored chicken. J Food Sci 2016, 81, M2006-M2014.
Min, J.-S.; Lee, S.-O.; Jang, A.; Jo, C.; Lee, M., Irradiation and organic acid treatment for microbial control and the production of biogenic amines in beef and pork. Food Chem 2007, 104, 791-799.
Morishita, Y.; Shiromizu, K., Characterization of lactobacilli isolated from meats and meat products. Int J Food Microbiol 1986, 3, 19-29.
Muermans, M.L.T.; Stekelenburg, F.K.; Zwietering, M.H.; Huis in 't Veld, J.H.J., Modelling of the microbiological quality of meat. Food Control 1993, 4, 216-221.
Murphy, K.M.; O'Grady, M.N.; Kerry, J.P., Effect of varying the gas headspace to meat ratio on the quality and shelf-life of beef steaks packaged in high oxygen modified atmosphere packs. Meat Sci 2013, 94, 447-454.
Narasimha Rao, D.; Sreenivasamurthy, V., A preliminary study of the effect of urea in the preservation of meat. Meat Sci 1986, 17, 251-265.
Nattress, F.M.; Baker, L.P., Effects of treatment with lysozyme and nisin on the microflora and sensory properties of commercial pork. Int J Food Microbiol 2003, 85, 259-267.
Nerbrink, E.; Borch, E., Evaluation of bacterial contamination at separate processing stages in emulsion sausage production. Int J Food Microbiol 1993, 20, 37-44.
Nieminen, T.T.; Dalgaard, P.; Björkroth, J., Volatile organic compounds and photobacterium phosphoreum associated with spoilage of modified-atmosphere-packaged raw pork. Int J Food Microbiol 2016, 218, 86-95.
Nieminen, T.T.; Nummela, M.; Björkroth, J., Packaging gas selects lactic acid bacterial communities on raw pork. J Appl Microbiol 2015, 119, 1310-1316.
Nieminen, T.T.; Vihavainen, E.; Paloranta, A.; Lehto, J.; Paulin, L.; Auvinen, P.; Solismaa, M.; Björkroth, J., Characterization of psychrotrophic bacterial communities in modified atmosphere-packed meat with terminal restriction fragment length polymorphism. Int J Food Microbiol 2011, 144, 360-366.
Noonpakdee, W.; Santivarangkna, C.; Jumriangrit, P.; Sonomoto, K.; Panyim, S., Isolation of nisin-producing lactococcus lactis wnc 20 strain from nham, a traditional thai fermented sausage. Int J Food Microbiol 2003, 81, 137-145.
Nortjé, G.L.; Shaw, B.G., The effect of ageing treatment on the microbiology and storage characteristics of beef in modified atmosphere packs containing 25% co2 plus 75% o2. Meat Sci 1989, 25, 43-58.
Nortjé, K.; Buys, E.M.; Minnaar, A., Effect of γ-irradiation on the sensory quality of moist beef biltong. Meat Sci 2005, 71, 603-611.
Nowak, A.; Kalemba, D.; Krala, L.; Piotrowska, M.; Czyzowska, A., The effects of thyme (thymus vulgaris) and rosemary (rosmarinus officinalis) essential oils on brochothrix thermosphacta and on the shelf life of beef packaged in high-oxygen modified atmosphere. Food Microbiol 2012, 32, 212-216.
Ntzimani, A.G.; Giatrakou, V.I.; Savvaidis, I.N., Combined natural antimicrobial treatments (edta, lysozyme, rosemary and oregano oil) on semi cooked coated chicken meat stored in vacuum packages at 4°c: Microbiological and sensory evaluation. Innov Food Sci Emerg Technol 2010, 11, 187-196.
Núñez, F.; Rodríguez, M.M.; Bermúdez, M.E.; Córdoba, J.J.; Asensio, M.A., Composition and toxigenic potential of the mould population on dry-cured iberian ham. Int J Food Microbiol 1996, 32, 185-197.
Ortuño, J.; Serrano, R.; Bañón, S., Antioxidant and antimicrobial effects of dietary supplementation with rosemary diterpenes (carnosic acid and carnosol) vs vitamin e on lamb meat packed under protective atmosphere. Meat Sci 2015, 110, 62-69.
Ortuño, J.; Serrano, R.; Jordán, M.J.; Bañón, S., Shelf life of meat from lambs given essential oil-free rosemary extract containing carnosic acid plus carnosol at 200 or 400mgkg−1. Meat Sci 2014, 96, 1452-1459.
Osés, S.M.; Diez, A.M.; Gómez, E.M.; Wilches-Pérez, D.; Luning, P.A.; Jaime, I.; Rovira, J., Control of escherichia coli and listeria monocytogenes in suckling-lamb meat evaluated using microbial challenge tests. Meat Sci 2015, 110, 262-269.
Osés, S.M.; Diez, A.M.; Melero, B.; Luning, P.A.; Jaime, I.; Rovira, J., Characterization by culture-dependent and culture-independent methods of the bacterial population of suckling-lamb packaged in different atmospheres. Food Microbiol 2013, 36, 216-222.
Palumbo, S.A., The growth of aeromonas hydrophila k144 in ground pork at 5°c. Int J Food Microbiol 1988, 7, 41-48.
Panea, B.; Ripoll, G.; González, J.; Fernández-Cuello, Á.; Albertí, P., Effect of nanocomposite packaging containing different proportions of zno and ag on chicken breast meat quality. J Food Eng 2014, 123, 104-112.
Papadopoulou, O.; Panagou, E.Z.; Tassou, C.C.; Nychas, G.J.E., Contribution of fourier transform infrared (ftir) spectroscopy data on the quantitative determination of minced pork meat spoilage. Food Res Int 2011, 44, 3264-3271.
Papadopoulou, O.S.; Doulgeraki, A.I.; Botta, C.; Cocolin, L.; Nychas, G.-J.E., Genotypic characterization of brochothrix thermosphacta isolated during storage of minced pork under aerobic or modified atmosphere packaging conditions. Meat Sci 2012, 92, 735-738.
Papadopoulou, O.S.; Tassou, C.C.; Schiavo, L.; Nychas, G.-J.E.; Panagou, E.Z., Rapid assessment of meat quality by means of an electronic nose and support vector machines. Procedia Food Science 2011, 1, 2003-2006.
Papamanoli, E.; Tzanetakis, N.; Litopoulou-Tzanetaki, E.; Kotzekidou, P., Characterization of lactic acid bacteria isolated from a greek dry-fermented sausage in respect of their technological and probiotic properties. Meat Sci 2003, 65, 859-867.
Paparella, A.; Mazzarrino, G.; Chaves-López, C.; Rossi, C.; Sacchetti, G.; Guerrieri, O.; Serio, A., Chitosan boosts the antimicrobial activity of origanum vulgare essential oil in modified atmosphere packaged pork. Food Microbiol 2016, 59, 23-31.
Patsias, A.; Chouliara, I.; Badeka, A.V.; Savvaidis, I.N.; Kontominas, M.G., Shelf-life of a chilled precooked chicken product stored in air and under modified atmospheres: Microbiological, chemical, sensory attributes. Food Microbiol 2006, 23, 423-429.
Patterson, M.F.; McKay, A.M.; Connolly, M.; Linton, M., Effect of high pressure on the microbiological quality of cooked chicken during storage at normal and abuse refrigeration temperatures. Food Microbiol 2010, 27, 266-273.
Pavelková, A.; Kačániová, M.; Horská, E.; Rovná, K.; Hleba, L.; Petrová, J., The effect of vacuum packaging, edta, oregano and thyme oils on the microbiological quality of chicken's breast. Anaerobe 2014, 29, 128-133.
Pennacchia, C.; Ercolini, D.; Villani, F., Spoilage-related microbiota associated with chilled beef stored in air or vacuum pack. Food Microbiol 2011, 28, 84-93.
Penney, N.; Bell, R.G.; Moorhead, S.M., Performance during retail display of hot and cold boned beef striploins after chilled storage in vacuum or carbon dioxide packaging. Food Res Int 1998, 31, 521-527.
Pereira, J.A.; Dionísio, L.; Patarata, L.; Matos, T.J.S., Effect of packaging technology on microbiological and sensory quality of a cooked blood sausage, morcela de arroz, from monchique region of portugal. Meat Sci 2015, 101, 33-41.
Pereira, M.; Malfeito-Ferreira, M., A simple method to evaluate the shelf life of refrigerated rabbit meat. Food Control 2015, 49, 70-74.
Petrou, S.; Tsiraki, M.; Giatrakou, V.; Savvaidis, I.N., Chitosan dipping or oregano oil treatments, singly or combined on modified atmosphere packaged chicken breast meat. Int J Food Microbiol 2012, 156, 264-271.
Rahkila, R.; Nieminen, T.T.; Johansson, P.; Säde, E.; Björkroth, J., Characterization and evaluation of the spoilage potential of lactococcus piscium isolates from modified atmosphere packaged meat. Int J Food Microbiol 2012, 156, 50-59.
Raimondi, S.; Nappi, M.R.; Sirangelo, T.M.; Leonardi, A.; Amaretti, A.; Ulrici, A.; Magnani, R.; Montanari, C.; Tabanelli, G.; Gardini, F., et al., Bacterial community of industrial raw sausage packaged in modified atmosphere throughout the shelf life. Int J Food Microbiol 2018, 280, 78-86.
Ramaroson, M.; Guillou, S.; Rossero, A.; Rezé, S.; Anthoine, V.; Moriceau, N.; Martin, J.-L.; Duranton, F.; Zagorec, M., Selection procedure of bioprotective cultures for their combined use with high pressure processing to control spore-forming bacteria in cooked ham. Int J Food Microbiol 2018, 276, 28-38.
Reid, R.; Fanning, S.; Whyte, P.; Kerry, J.; Lindqvist, R.; Yu, Z.; Bolton, D., The microbiology of beef carcasses and primals during chilling and commercial storage. Food Microbiol 2017, 61, 50-57.
Ridell, J.; Korkeala, H., Minimum growth temperatures of hafnia alvei and other enterobacteriaceae isolated from refrigerated meat determined with a temperature gradient incubator. Int J Food Microbiol 1997, 35, 287-292.
Riel, G.; Boulaaba, A.; Popp, J.; Klein, G., Effects of parsley extract powder as an alternative for the direct addition of sodium nitrite in the production of mortadella-type sausages – impact on microbiological, physicochemical and sensory aspects. Meat Sci 2017, 131, 166-175.
Rodel, W.; Lucke, F.K., Effect of redox potential on bacillus subtilis and bacillus licheniformis in broth and in pasteurized sausage mixtures. Int J Food Microbiol 1990, 10, 291-301.
Rodrigues, J.B.M.; Sarantópoulos, C.I.G.L.; Bromberg, R.; Andrade, J.C.; Brunelli, K.; Miyagusku, L.; Marquezini, M.G.; Yamada, E.A., Evaluation of the effectiveness of non-irradiated and chlorine-free packaging for fresh beef preservation. Meat Sci 2017, 125, 30-36.
Rodríguez-Calleja, J.M.; García-López, M.-L.; Santos, J.A.; Otero, A., Development of the aerobic spoilage flora of chilled rabbit meat. 2005; Vol. 70, pp 389-394.
Rogers, H.B.; Brooks, J.C.; Martin, J.N.; Tittor, A.; Miller, M.F.; Brashears, M.M., The impact of packaging system and temperature abuse on the shelf life characteristics of ground beef. Meat Sci 2014, 97, 1-10.
Rossaint, S.; Klausmann, S.; Kreyenschmidt, J., Effect of high-oxygen and oxygen-free modified atmosphere packaging on the spoilage process of poultry breast fillets. Poult Sci 2015, 94, 96-103.
Rouger, A.; Moriceau, N.; Prévost, H.; Remenant, B.; Zagorec, M., Diversity of bacterial communities in french chicken cuts stored under modified atmosphere packaging. Food Microbiol 2018, 70, 7-16.
Rubio, B.; Martínez, B.; Sánchez, M.J.; Dolores García-Cachán, M.; Rovira, J.; Jaime, I., Study of the shelf life of a dry fermented sausage “salchichon” made from raw material enriched in monounsaturated and polyunsaturated fatty acids and stored under modified atmospheres. Meat Sci 2007, 76, 128-137.
Rubio, R.; Martín, B.; Aymerich, M.T.; Garriga, M., The potential probiotic lactobacillus rhamnosus ctc1679 survives the passage through the gastrointestinal tract and its use as starter culture results in safe nutritionally enhanced fermented sausages. Int J Food Microbiol 2014, 186, 55-60.
Ruiz-Capillas, C.; Jiménez-Colmenero, F., Effect of an argon-containing packaging atmosphere on the quality of fresh pork sausages during refrigerated storage. Food Control 2010, 21, 1331-1337.
Rukchon, C.; Nopwinyuwong, A.; Trevanich, S.; Jinkarn, T.; Suppakul, P., Development of a food spoilage indicator for monitoring freshness of skinless chicken breast. Talanta 2014, 130, 547-554.
Russell, S.M.; Fletcher, D.L.; Cox, N.A., Spoilage bacteria of fresh broiler chicken carcasses. Poult Sci 1995, 74, 2041-2047.
Russo, F.; Ercolini, D.; Mauriello, G.; Villani, F., Behaviour of brochothrix thermosphacta in presence of other meat spoilage microbial groups. 2006; Vol. 23, pp 797-802.
Sachindra, N.M.; Sakhare, P.Z.; Yashoda, K.P.; Narasimha Rao, D., Microbial profile of buffalo sausage during processing and storage. Food Control 2005, 16, 31-35.
Säde, E.; Murros, A.; Björkroth, J., Predominant enterobacteria on modified-atmosphere packaged meat and poultry. Food Microbiol 2013, 34, 252-258.
Säde, E.; Penttinen, K.; Björkroth, J.; Hultman, J., Exploring lot-to-lot variation in spoilage bacterial communities on commercial modified atmosphere packaged beef. Food Microbiol 2017, 62, 147-152.
Sadler, D.N.; Swan, J.E., Chilled storage life of hot-boned, pre-rigor, salted minced beef. Meat Sci 1997, 45, 427-437.
Sadler, D.N.; Swan, J.E., Effect of nacl, polydextrose, and storage conditions on the functional characteristics and microbial quality of pre- and post-rigor salted beef. Meat Sci 1997, 46, 329-338.
Samapundo, S.; Ampofo-Asiama, J.; Anthierens, T.; Xhaferi, R.; Van Bree, I.; Szczepaniak, S.; Goemaere, O.; Steen, L.; Dhooge, M.; Paelinck, H., et al., Influence of nacl reduction and replacement on the growth of lactobacillus sakei in broth, cooked ham and white sauce. Int J Food Microbiol 2010, 143, 9-16.
Schirmer, B.C.; Langsrud, S., A dissolving co2 headspace combined with organic acids prolongs the shelf-life of fresh pork. Meat Sci 2010, 85, 280-284.
Schulz, E.; Jensen, B.; Celerynova, E., Automated turbidimetry for rapid determination of the bacteriological quality of raw meat and processed meat products. Int J Food Microbiol 1988, 6, 219-227.
Senter, S.D.; Arnold, J.W.; Chew, V., Apc values and volatile compounds formed in commercially processed, raw chicken parts during storage at 4 and 13°c and under simulated temperature abuse conditions. J Sci Food Agric 2000, 80, 1559-1564.
Serrano, R.; Bañón, S., Reducing so2 in fresh pork burgers by adding chitosan. Meat Sci 2012, 92, 651-658.
Serrano, R.; Jordán, M.J.; Bañón, S., Use of dietary rosemary extract in ewe and lamb to extend the shelf life of raw and cooked meat. Small Ruminant Res 2014, 116, 144-152.
Shange, N.; Makasi, T.N.; Gouws, P.A.; Hoffman, L.C., The influence of normal and high ultimate muscle ph on the microbiology and colour stability of previously frozen black wildebeest (connochaetes gnou) meat. Meat Sci 2018, 135, 14-19.
Sheridan, J.J.; Doherty, A.M.; Allen, P.; McDowell, D.A.; Blair, I.S.; Harrington, D., The effect of vacuum and modified atmosphere packaging on the shelf-life of lamb primals, stored at different temperatures. Meat Sci 1997, 45, 107-117.
Shu, H.-C.; H»kanson, H.k.; Mattiasson, B., D-lactic acid in pork as a freshness indicator monitored by immobilized d-lactate dehydrogenase using sequential injection analysis. Anal Chim Acta 1993, 283, 727-737.
Silva, N.B.d.; Longhi, D.A.; Martins, W.F.; Laurindo, J.B.J.B.; Aragão, G.M.F.d.; Carciofi, B.A.M.; da Silva, N.B.; Longhi, D.A.; Martins, W.F.; Laurindo, J.B.J.B., et al., Modeling the growth of lactobacillus viridescens under non-isothermal conditions in vacuum-packed sliced ham. Int J Food Microbiol 2017, 240, 97-101.
Sirocchi, V.; Devlieghere, F.; Peelman, N.; Sagratini, G.; Maggi, F.; Vittori, S.; Ragaert, P., Effect of rosmarinus officinalis l. Essential oil combined with different packaging conditions to extend the shelf life of refrigerated beef meat. Food Chem 2017, 221, 1069-1076.
Skandamis, P.N.; Nychas, G.-J.E., Preservation of fresh meat with active and modified atmosphere packaging conditions. Int J Food Microbiol 2002, 79, 35-45.
Slongo, A.P.; Amauri, R.B.; Camargo, L.M.Q.; Deliza, R.; Mathias, S.P.; de Aragao, G.M.F., Modeling the growth of lactic acid bacteria in sliced ham processed by high hydrostatic pressure. Lebensm Wiss Technol 2009, 42, 303-306.
Smolander, M.; Alakomi, H.L.; Ritvanen, T.; Vainionpää, J.; Ahvenainen, R., Monitoring of the quality of modified atmosphere packaged broiler chicken cuts stored in different temperature conditions. A. Time-temperature indicators as quality-indicating tools. Food Control 2004, 15, 217-229.
Sørensen, L.M.; Jacobsen, T.; Nielsen, P.V.; Frisvad, J.C.; Koch, A.G., Mycobiota in the processing areas of two different meat products. Int J Food Microbiol 2008, 124, 58-64.
Sørheim, O.; Erlandsen, T.; Nissen, H.; Lea, P.; Høyem, T., Effects of modified atmosphere storage on colour and microbiological shelf life of normal and pale, soft and exudative pork. Meat Sci 1997, 47, 147-155.
Sørheim, O.; Nissen, H.; Nesbakken, T., The storage life of beef and pork packaged in an atmosphere with low carbon monoxide and high carbon dioxide. Meat Sci 1999, 52, 157-164.
Stahl, V.; Ndoye, F.T.; El Jabri, M.; Le Page, J.F.; Hezard, B.; Lintz, A.; Geeraerd, A.H.; Alvarez, G.; Thuault, D., Safety and quality assessment of ready-to-eat pork products in the cold chain. J Food Eng 2015, 148, 43-52.
Stellato, G.; La Storia, A.; Filippis, F.D.; Borriello, G.; Villani, F.; Ercolini, D., Overlap of spoilage microbiota between meat and meat processing environment in small-scale vs large-scale retail distribution. Appl Environ Microbiol 2016, 82, 4045-4054.
Stojanović-Radić, Z.; Pejčić, M.; Joković, N.; Jokanović, M.; Ivić, M.; Šojić, B.; Škaljac, S.; Stojanović, P.; Mihajilov-Krstev, T.; Stojanovic-Radic, Z., et al., Inhibition of salmonella enteritidis growth and storage stability in chicken meat treated with basil and rosemary essential oils alone or in combination. Food Control 2018, 90, 332-343.
Stoops, J.; Ruyters, S.; Busschaert, P.; Spaepen, R.; Verreth, C.; Claes, J.; Lievens, B.; Van Campenhout, L., Bacterial community dynamics during cold storage of minced meat packaged under modified atmosphere and supplemented with different preservatives. Food Microbiol 2015, 48, 192-199.
Susiluoto, T.; Korkeala, H.; Björkroth, J., Leuconostoc gasicomitatum is the dominating lactic acid bacterium in retail modified-atmosphere-packaged marinated broiler meat strips on sell-by-day. Int J Food Microbiol 2003, 80, 89-97.
Torrieri, E.; Russo, F.; Di Monaco, R.; Cavella, S.; Villani, F.; Masi, F., Shelf life prediction of fresh italian pork sausage modified atmosphere packed. Food Sci Technol Int 2011, 17, 223-232.
Tremonte, P.; Sorrentino, E.; Succi, M.; Reale, A.; Maiorano, G.; Coppola, R., Shelf life offresh sausages stored under modified atmospheres. J Food Prot 2005, 68, 2686-2692.
Triki, M.; Herrero, A.M.; Jiménez-Colmenero, F.; Ruiz-Capillas, C., Effect of preformed konjac gels, with and without olive oil, on the technological attributes and storage stability of merguez sausage. Meat Sci 2013, 93, 351-360.
Tsakanikas, P.; Pavlidis, D.; Panagou, E.; Nychas, G.-J., Exploiting multispectral imaging for non-invasive contamination assessment and mapping of meat samples. Talanta 2016, 161, 606-614.
Vaikousi, H.; Biliaderis, C.G.; Koutsoumanis, K.P., Applicability of a microbial time temperature indicator (tti) for monitoring spoilage of modified atmosphere packed minced meat. Int J Food Microbiol 2009, 133, 272-278.
Van Haute, S.; Raes, K.; Devlieghere, F.; Sampers, I., Combined use of cinnamon essential oil and map/vacuum packaging to increase the microbial and sensorial shelf life of lean pork and salmon. Food Packaging and Shelf Life 2017, 12, 51-58.
Vasilatos, G.C.; Savvaidis, I.N., Chitosan or rosemary oil treatments, singly or combined to increase turkey meat shelf-life. Int J Food Microbiol 2013, 166, 54-58.
Vasilopoulos, C.; De Maere, H.; De Mey, E.; Paelinck, H.; De Vuyst, L.; Leroy, F., Technology-induced selection towards the spoilage microbiota of artisan-type cooked ham packed under modified atmosphere. Food Microbiol 2010, 27, 77-84.
Vasilopoulos, C.; De Mey, E.; Dewulf, L.; Paelinck, H.; De Smedt, A.; Vandendriessche, F.; De Vuyst, L.; Leroy, F., Interactions between bacterial isolates from modified-atmosphere-packaged artisan-type cooked ham in view of the development of a bioprotective culture. Food Microbiol 2010, 27, 1086-1094.
Venugopal, R.J.; Ingham, S.C.; McCurdy, A.R., Identification of psychrotrophic micrococcaceae spp. Isolated from fresh beef stored under carbon dioxide or vacuum. Int J Food Microbiol 1994, 23, 167-178.
Vermeiren, L.; Devlieghere, F.; Debevere, J., Evaluation of meat born lactic acid bacteria as protective cultures for the biopreservation of cooked meat products. Int J Food Microbiol 2004, 96, 149-164.
Vermeiren, L.; Devlieghere, F.; Vandekinderen, I.; Debevere, J., The interaction of the non-bacteriocinogenic lactobacillus sakei 10a and lactocin s producing lactobacillus sakei 148 towards listeria monocytogenes on a model cooked ham. Food Microbiol 2006, 23, 511-518.
Vestergaard, J.S.; Martens, M.; Turkki, P., Analysis of sensory quality changes during storage of a modified atmosphere packaged meat product (pizza topping) by an electronic nose system. Lebensm-Wiss Technol 2007, 40, 1083-1094.
Viana, E.S.S.; Gomide, L.A.M.A.M.; Vanetti, M.C.D.C.D., Effect of modified atmospheres on microbiological, color and sensory properties of refrigerated pork. Meat Sci 2005, 71, 696-705.
Vihavainen, E.J.; Björkroth, J., Diversity of leuconostoc gasicomitatum associated with meat spoilage. Int J Food Microbiol 2009, 136, 32-36.
Vihavainen, E.J.; Björkroth, J., Spoilage of value-added, high-oxygen modified-atmosphere packaged raw beef steaks by leuconostoc gasicomitatum and leuconostoc gelidum. 2007; Vol. 119, pp 340-345.
Voidarou, C.; Vassos, D.; Rozos, G.; Alexopoulos, A.; Plessas, S.; Tsinas, A.; Skoufou, M.; Stavropoulou, E.; Bezirtzoglou, E., Microbial challenges of poultry meat production. Anaerobe 2011, 17, 341-343.
von Holy, A.; Cloete, T.E.; Holzapfel, W.H., Quantification and characterization of microbial populations associated with spoiled, vacuum-packed vienna sausages. Food Microbiol 1991, 8, 95-104.
Wang, G.-y.; Wang, H.-h.; Han, Y.-w.; Xing, T.; Ye, K.-p.; Xu, X.-L.; Zhou, G.-H., Evaluation of the spoilage potential of bacteria isolated from chilled chicken in vitro and in situ. Food Microbiol 2017, 63, 139-146.
Wang, J.; Zhuang, H.; Hinton, A.; Zhang, J., Influence of in-package cold plasma treatment on microbiological shelf life and appearance of fresh chicken breast fillets. Food Microbiol 2016, 60, 142-146.
Xavier, M.d.l.P.; Dauber, C.; Mussio, P.; Delgado, E.; Maquieira, A.; Soria, A.; Curuchet, A.; Márquez, R.; Méndez, C.; López, T., Use of mild irradiation doses to control pathogenic bacteria on meat trimmings for production of patties aiming at provoking minimal changes in quality attributes. Meat Sci 2014, 98, 383-391.
Yang, X.; Youssef, M.K.; Gill, C.O.; Badoni, M.; López-Campos, Ó., Effects of meat ph on growth of 11 species of psychrotolerant clostridia on vacuum packaged beef and blown pack spoilage of the product. Food Microbiol 2014, 39, 13-18.
Zeitoun, A.A.M.; Debevere, J.M., Decontamination with lactic acid/sodium lactate buffer in combination with modified atmosphere packaging effects on the shelf life of fresh poultry. Int J Food Microbiol 1992, 16, 89-98.
Zeitoun, A.A.M.; Debevere, J.M., Inhibition, survival and growth of listeria monocytogenes on poultry as influenced by buffered lactic acid treatment and modified atmosphere packaging. Int J Food Microbiol 1991, 14, 161-169.
Zeitoun, A.A.M.; Debevere, J.M., The effect of treatment with buffered lactic acid on microbial decontamination and on shelf life of poultry. Int J Food Microbiol 1990, 11, 305-311.
Zhang, Q.Q.; Han, Y.Q.; Cao, J.X.; Xu, X.-L.; Zhou, G.-H.; Zhang, W.Y., The spoilage of air-packaged broiler meat during storage at normal and fluctuating storage temperatures. Poult Sci 2012, 91, 208-214.
